# Supplementary material
Source: PubMed Central journal article supplement (PMC8236268)
Supplement: NIHMS1704019-supplement-1.pdf [file NIHMS1704019-supplement-1.pdf]

|       |              |                                                                                                                                                       |                            |                |
|-------|--------------|-------------------------------------------------------------------------------------------------------------------------------------------------------|----------------------------|----------------|
| Mouse | IL-1 beta    | AAAAGAAGGTGCTCATGTCCTCATCCTGGAAGGTCCAC<br>GGGAAAGACACAGGTAGCTGCCACAGCTTCTCCACAG<br>CCACAATGAGTGATACTGCCTGCCTGAAGCTCT<br>TGTTGAT                       |                            | NC_000068.7    |
|       | CCL2         | GACATACATTA AAAACCTGGATCGGAACCAAATGAGAT<br>CAGAACCTACAACCTTTATTTAAACTGCATCTGCCCTAA<br>GGTCTTCAGCACCTTTGAATGTGAAGTTGACCC<br>GTAAATCTGAAGCTAATGCATCCACT |                            | NC_000077.6    |
|       | SIRT1        | GGAACCTTTGCCTCATCTA<br>CA                                                                                                                             | CACCTAGCCTATGACAC<br>AACTC | NM_019812.3    |
|       | LXR $\alpha$ | GAGGGACAGTGTCTTGGA<br>ATG                                                                                                                             | CCGTTGCAGAATCAGGA<br>GAA   | NM_001177730.1 |
|       | ABCA1        | GGGTGGTGTTCCTCAT<br>TAC                                                                                                                               | CACATCCTCATCCTCGT<br>CATT  | NM_013454.3    |
|       | ABCG1        | TCCTCCCAGACTTCCTTTCT                                                                                                                                  | CCACAAGGTGGATCGA<br>GTATTT | NM_009593.2    |

**ESM Table 1. Primer sequences used in qRTPCR analysis.**

| Antigen              | Fluorophore     | Vendor       | Number       | Titer |
|----------------------|-----------------|--------------|--------------|-------|
| <b>Ly6G</b>          | SB600           | ThermoFisher | 63-9668-82   | 1/200 |
| <b>CD45</b>          | SB645           | ThermoFisher | 64-0451-82   | 1/100 |
| <b>CD11b</b>         | SB780           | ThermoFisher | 78-0112-82   | 1/100 |
| <b>CCR2</b>          | FITC            | R&D Systems  | FAB5538F-100 | 1/100 |
| <b>CD133</b>         | PercP-eFluor710 | ThermoFisher | 46-1331-82   | 1/100 |
| <b>Ly6C</b>          | APC             | ThermoFisher | 17-5932-52   | 1/200 |
| <b>Flk-1</b>         | AF700           | ThermoFisher | 56-5821-81   | 1/100 |
| <b>Viability dye</b> | eFluor506       | ThermoFisher | 65-0866-14   | 1/200 |

**ESM Table 2.** Panel of antibodies used to determine myeloid cells on bone marrow and blood. For preparation of antibody mixes, Brilliant Stain buffer was used and samples were incubated for 30 minutes at 4°C in the dark, followed by two washes. Titers refer to final dilution factors, and staining volume per sample was 100 µl. SB: Super Bright, BV: Brilliant Violet, BB: Brilliant Blue, AF: AlexaFluor, PE: Phycoerythrin, APC: Allophycocyanin.

| Antigen                 | Fluorophore | Vendor       | Number     | Titer |
|-------------------------|-------------|--------------|------------|-------|
| <b>c-Kit (CD117)</b>    | SB436       | ThermoFisher | 48-1171-82 | 1/100 |
| <b>FcyRII/III</b>       | SB600       | ThermoFisher | 63-0161-82 | 1/100 |
| <b>Sca-1</b>            | SB645       | ThermoFisher | 64-5981-82 | 1/100 |
| <b>Lineage cocktail</b> | FITC        | ThermoFisher | 22-7778-72 | 1/50  |
| <b>CD34</b>             | PE          | ThermoFisher | MA5-17831  | 1/100 |
| <b>Flk2/Flt3</b>        | APC         | ThermoFisher | 17-1357-41 | 1/100 |
| <b>CD127 (IL7Ra)</b>    | APC-Cy7     | ThermoFisher | 47-1271-82 | 1/100 |
| <b>Viability dye</b>    | eFluor506   | ThermoFisher | 65-0866-14 | 1/200 |

**ESM Table 3.** Panel of antibodies used to determine precursor cells on bone marrow. For preparation of antibody cocktail, Brilliant Stain buffer was used and samples were incubated for 30 minutes at 4°C in the dark, followed by two washes. Titers refer to final dilution factors, and staining volume per sample was 100 µl. SB: Super Bright, BV: Brilliant Violet, BB: Brilliant Blue, AF: AlexaFluor, PE: Phycoerythrin, APC: Allophycocyanin.

# ESM Figure 1

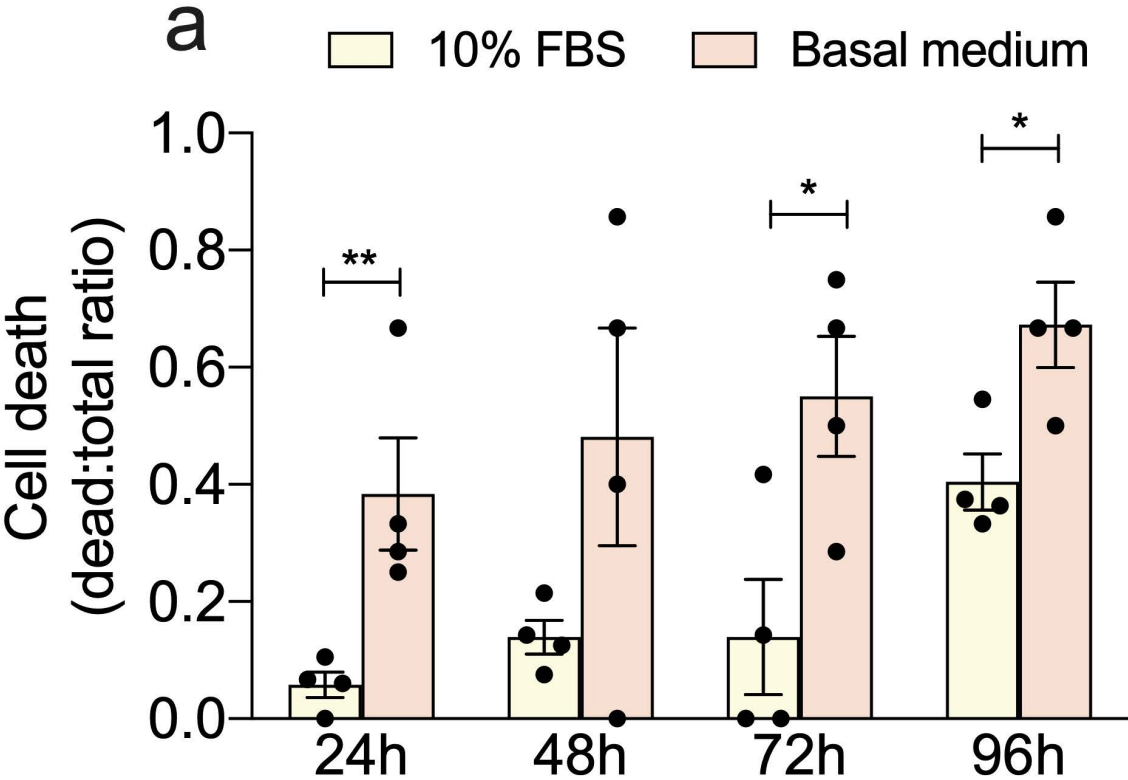

**ESM Fig. 1. Long-term exposure to base media leads to retinal endothelial (REC) cell death.** REC were culture in base media (MCDB 131 medium) without serum or growth factors present. Cell death was assayed via trypan blue exclusion assay, n=4; \*p<0.05, \*\*p<0.001. Data are represented as mean ± SEM.

## ESM Figure 2

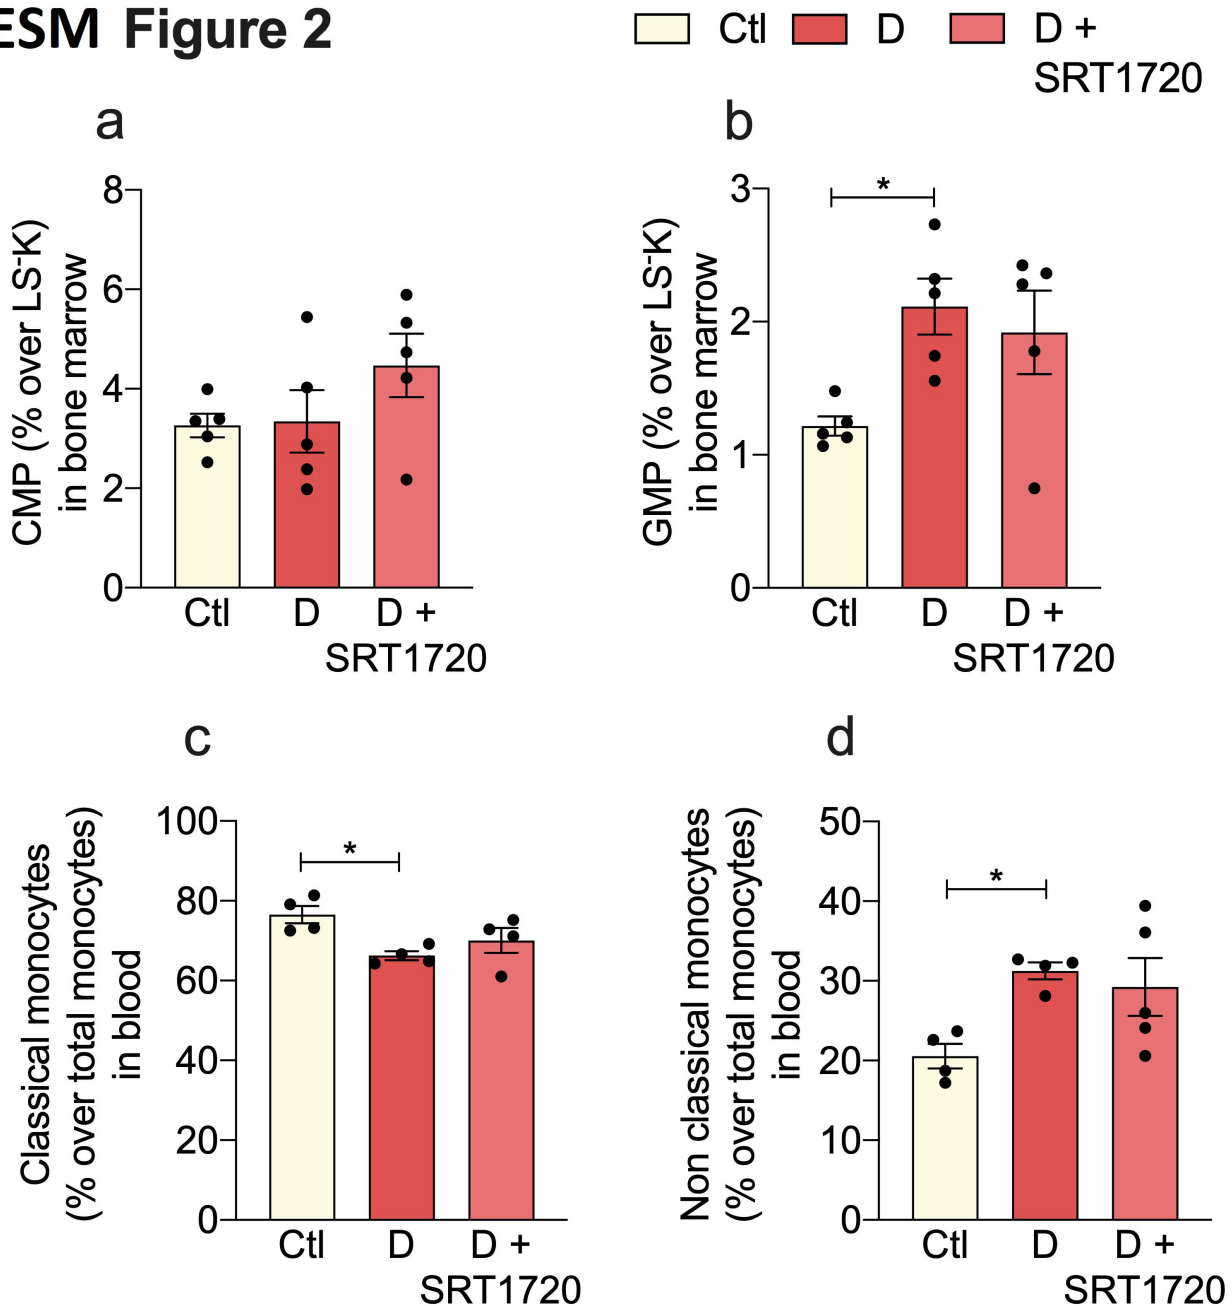

**ESM Fig. 2. Diabetes (6 months)-induced changes in the bone marrow and blood of db/db mice.** Diabetes significantly increases the number of GMP (B) without a change in CMP (A) in the bone marrow. The SIRT1 agonist SRT1720 had a tendency towards an increase in CMP (A) and decrease on GMP (B), but SRT1720 effect did not reach significance, n=5. In the blood, diabetes induces decrease in the classical (C), and increase in non-classical (D) monocytes, the effect was not corrected by SRT1720, n=4; \*p<0.01. Data are represented as mean ± SEM.
